# Supplementary material for: Investigation of Experimental Factors That Underlie BRCA1/2 mRNA Isoform Expression Variation: Recommendations for Utilizing Targeted RNA Sequencing to Evaluate Potential Spliceogenic Variants
Source: Front Oncol. 2018 May 3;8:140. doi: 10.3389/fonc.2018.00140 (PMC5943536; doi:10.3389/fonc.2018.00140)
Supplement: Supplementary file 13 [file table_2.xlsx]

## Sheet: Sheet1
Table S2. Oligonucleotide probes used for sequencing BRCA1 using the TruSeq Targeted mRNA Expression kit.
BRCA1 chr17 Minus strand
Transcript ID	Assay ID	Left Exon	Right Exon	Start Position	End Position	ULSO Sequence	ULSO Genomic Hits	DLSO Sequence	DLSO Genomic Hits
NM_007299	6730620	1	0	41277321	41276106	CTCAGGAGGCCTTCACCCTCTGCTCT	2	TTCATTGGAACAGAAAGAAATGGATTT	2
NM_007300	6730382	2	1	41276068	41267768	AATGCTATGCAGAAAATCTTAGAGTGTCC	2	GGAGTTGATCAAGGAACCTGTCTCCA	1
NM_007300	6730371	5	3	41258509	41256939	CACAGTGTCCTTTATGTAAGAATGATATAA	1	TACAAGAAAGTACGAGATTTAGTCAACTTG	1
NM_007300	6730387	6	5	41256910	41256252	TTTTCAGCTTGACACAGGTTTGGAG	1	ATGCAAACAGCTATAATTTTGCAAAAA	1
NM_007300	6730642	7	6	41256171	41251866	CTTCTACAGAGTGAACCCGAAAATCCT	1	CCAGTCTCAGTGTCCAACTCTCTAA	3
NM_007300	6730366	8	7	41251826	41249273	ACAACCTCAAAAGACGTCTGTCTACA	1	TTCTTCTGAAGATACCGTTAATAAGGC	1
NM_007300	6730648	9	8	41249295	41247897	TCTGAAGATACCGTTAATAAGGCAACT	1	ATTGTTACAAATCACCCCTCAAGGAACC	1
NM_007300	6730119	10	9	41247895	41246839	GGGATGAAATCAGTTTGGATTCTGCAA	1	TTTTCTGAGACGGATGTAACAAATACTG	1
NM_007300	6730639	11	10	41243488	41243013	AATAATCAAGAAGAGCAAAGCATGGATTC	1	TGGGTGTGAGAGTGAAACAAGCGT	1
NM_007300	6730628	12	11	41242995	41234565	GGCTATCCTCTCAGAGTGACATTTTAACC	1	AGGGATACCATGCAACATAACCTGA	1
NM_007300	6729855	13	12	41234455	41231382	CCTGCGAAATCCAGAACAAAGCACAT	1	TATACATGGCCAAAGGAACAACTCCATG	82
NM_007300	6730131	14	13	41231391	41228598	CAACTCCATGTTTTCTAAAAGGCCTAGAG	107	TAACTTCACAGAAAAGTAGTGAATACCC	1
NM_007300	6730125	15	14	41228539	41226510	TCTACCAGTAAAAATAAAGAACCAGGAGTG	1	TCATCCCCTTCTAAATGCCCATCATTAG	1
NM_007300	6730113	16	15	41226384	41223219	TTGACGGAAACATCTTACTTGCCAAGG	1	TACCTGGAATCTGGAATCAGCCTCTT	1
NM_007300	6730101	18	17	41219659	41215938	TACTGAAGAGACTACTCATGTTGTTATG	1	GAGTTTGTGTGTGAACGGACACTGAA	1
NM_007300	6730893	19	18	41215923	41215357	TTGCGGGAGGAAAATGGGTAGTTAG	2	ACCCAGTCTATTAAAGAAAGAAAAATGCTG	1
NM_007300	6730902	20	19	41215383	41209110	CCAGTCTATTAAAGAAAGAAAAATGCTGA	1	AGATGTGGTCAATGGAAGAAACCA	4
NM_007300	6730622	21	20	41209103	41203091	GTCCAAAGCGAGCAAGAGAATCCCA	1	TCTGTTGCTATGGGCCCTTCACCAA	1
NM_007300	6730634	22	21	41203110	41201180	TGCTATGGGCCCTTCACCAACAT	4	GGAATGGATGGTACAGCTGTGTGGT	1
NM_007300	6730377	23	22	41201170	41199677	GTGAAGGAGCTTTCATCATTCACCCT	2	GGTTGTGCAGCCAGATGCCTGGACAGA	2
NM_007300	6730107	24	23	41199688	41197797	TGCCTGGACAGAGGACAATGGCTT	2	AATTGGGCAGATGTGTGAGGCA	17
NR_027676	6963459	2	NA	41267791	41258544	AGTTGATCAAGGAACCTGTCTCCACA	1	TGTGACCACATATTTTGCAAATTTTGC	0
NR_027676	6963692	10	NA	41244028	41243971	TCTGCTGTTTTTAGCAAAAGCGTCCAG	1	GAGAGCTTAGCAGGAGTCCTAGCCCTT	1
NR_027676	6963681	10	NA	41245267	41245211	GAAAGATCTGTAGAGAGTAGCAGTATTTC	1	TGGTACCTGGTACTGATTATGGCACT	1
NR_027676	6963683	10	NA	41244160	41244104	TCAGATAACTTAGAACAGCCTATGGGA	1	GTCATGCATCTCAGGTTTGTTCTGAG	4
NR_027676	6963684	10	NA	41245118	41245063	CCCCAAGGGACTAATTCATGGTTGTT	1	AAGATAATAGAAATGACACAGAAGGCT	1
NR_027676	6963946	10	NA	41243978	41243920	TAGCCCTTTCACCCATACACATTTGG	1	TTACCGAAGAGGGGCCAAGAAATTAG	1
NR_027676	6963937	10	NA	41244962	41244907	GGTTTCAAAGCGCCAGTCATTTGCT	1	TCAAATCCAGGAAATGCAGAAGAGG	10
NR_027676	6963458	12	NA	41234500	41234446	TAACAGCTACCCTTCCATCATAAGTGAC	1	TCTGCCCTTGAGGACCTGCGAAAT	1
NR_027676	6963460	13	NA	41228609	41228556	TAGTGAATACCCTATAAGCCAGAATCCAG	1	GGCCTTTCTGCTGACAAGTTTGA	7
NR_027676	6963935	15	NA	41223003	41222946	CAGAAAGGGTCAACAAAAGAATGTCCA	1	TCTGGCCTGACCCCAGAAGAATT	8
NR_027676	6963940	23	NA	41196434	41196380	AAGGACTAGGTCTTCCCTAGCCC	2	TGTGCAAGGGCAGTGAAGACTTGATT	1
NR_027676	6963456	23	NA	41197304	41197245	TTTACTTCTCTAAAACCCTGTGTTCAC	1	AGAGAGTCAGACCCTTCAATGGAAGGA	1
NR_027676	6962178	23	NA	41197685	41197630	GCCACAGGTACAGAGCCACAGGA	9	ATGAGCTTACAAAGTGGCCTTTCCA	3
