# Supplementary material for: Investigation of Experimental Factors That Underlie BRCA1/2 mRNA Isoform Expression Variation: Recommendations for Utilizing Targeted RNA Sequencing to Evaluate Potential Spliceogenic Variants
Source: Front Oncol. 2018 May 3;8:140. doi: 10.3389/fonc.2018.00140 (PMC5943536; doi:10.3389/fonc.2018.00140)
Supplement: Supplementary file 14 [file table_3.xlsx]

## Sheet: Sheet1
Table S3. Oligonucleotide probes used for sequencing BRCA2 using the TruSeq Targeted mRNA Expression kit.
BRCA2 chr13 Plus strand
Transcript ID	Assay ID	Left Exon	Right Exon	Start Position	End Position	ULSO Sequence	ULSO Genomic Hits	DLSO Sequence	DLSO Genomic Hits
NM_000059	6803177	1	2	32890636	32893257	AATTTTTAAGACACGCTGCAACAAAGC	1	GTCTTAATTGGTTTGAAGAACTTTCTTCA	1
NM_000059	6803189	3	4	32899287	32900272	TCCTGTCCACTTCTAAATTCTTGTCTT	1	GTTCTACAATGTACACATGTAACACCAC	1
NM_000059	6803462	5	6	32900388	32900677	GGAGTTTGTTTCATACACCAAAGTTTGTG	1	AAAACATATTTCTGAAAGTCTAGGAGCTG	1
NM_000059	6803181	7	8	32903597	32905095	TCTGAAACTGTATTTCCTCATGATACTAC	1	CTATTTTTCCAATCATGATGAAAGTCTGA	1
NM_000059	6803463	8	9	32905135	32906449	AAAACACAAATCAAAGAGAAGCTGCAAG	2	ACATCAGGGAATTCATTTAAAGTAAATAGC	1
NM_000059	6803183	9	10	32907494	32910432	GCACCACTTACATTTGCAAATGCTG	1	TTTATTGCATTCTTCTGTGAAAAGAAGCTG	1
NM_000059	6803187	10	11	32915301	32918727	GAAAAAGAAGAGGAGAGCCCCTTATCT	1	AACCCTCAATCAAAAGAAACTTATTAAATG	1
NM_000059	6803182	11	12	32918760	32921003	TCCTTAAAGGCTTCAAAAAGCACTCC	1	TCGAAGATTGTTTATGCATCATGTTTC	1
NM_000059	6803185	13	14	32929393	32930594	TAACTTTCACAAAGTGTGAAGAAGAACC	1	TTTAATTACAAGTCTTCAGAATGCCAGAG	1
NM_000059	6803184	14	15	32930716	32931920	CCAAGTTCCCTCTGCGTGTTCTCATAA	1	GCGTTTCTAAACATTGCATAAAAATTAAC	1
NM_000059	6803180	15	16	32932032	32936698	AATGATGGAAAGGCTGGAAAAGAAGAA	1	ACTCCAGGTGTGGATCCAAAGCTTAT	1
NM_000059	6803461	16	17	32936796	32937350	AGCCCAGAAAGGGTGCTTCTTCAACTA	1	ACGGAAATTGATAGAAGCAGAAGATCGG	1
NM_000059	6803178	19	20	32945203	32950849	CACTAAAATTCAGGAGGAATTTGAAGAAC	1	CATATTTACCATCACGTGCACTAACAAG	1
NM_000059	6803186	20	21	32950894	32953483	CAGTGAAGAATGCAGCAGACCCAGCTTA	1	GTTATTTCAGTGAAGAGCAGTTAAGAGCC	1
NM_000059	6803460	21	22	32953610	32953916	AAGTTGCGTATTGTAAGCTATTCAAAA	1	TACTGAGTATTTGGCGTCCATCATCAG	1
NM_000059	6803188	23	24	32954248	32968857	AATAGGATTTGTCGTTTCTGTTGTGAA	1	GCCCCTTTCGTCTATTTGTCAGACGAA	1
NM_000059	6803179	24	25	32969036	32971078	AAGAGACATTCAACAAAATGAAAAATACTG	1	ATGAAGCAGAAAACAAGCTTATGCA	2
NM_000059	6962406	9	NA	32906699	32906755	GATACTGATCCATTAGATTCAAATGTAGC	1	ATCAGAAGCCCTTTGAGAGTGGAAGT	2
NM_000059	6962409	9	NA	32906452	32906509	CAAAGACCACATTGGAAAGTCAATGCC	1	ATGTCCTAGAAGATGAAGTATATGAAACA	1
NM_000059	6962410	9	NA	32906952	32907009	TGCCACGTATTTCTAGCCTACCAAA	1	GAAGCCATTAAATGAGGAAACAGTGGT	1
NM_000059	6962688	9	NA	32906869	32906927	ATGTGACCAAAATATTTCAGAAAAAGACC	1	TTAGACACAGAGAACAAAAGAAAGAAAG	1
NM_000059	6962405	10	NA	32913025	32913081	ACGTGATGAAAAGATCAAAGAACCTACTC	1	TTGGGTTTTCATACAGCTAGCGGGAA	1
NM_000059	6962690	10	NA	32911858	32911915	AAGTCAGTTTGAATTTACTCAGTTTAGAA	1	CCAAGCTACATATTGCAGAAGAGTACA	1
NM_000059	6962403	10	NA	32914975	32915034	CAAACAACAGTTGGTATTAGGAACCAAAG	1	TCACTTGTTGAGAACATTCATGTTTTGGG	1
NM_000059	6962407	12	NA	32921009	32929026	AGCCGATTACCTGTGTACCCTTT	5	ACTAAGGAACGTCAAGAGATACAGA	1
NM_000059	6962404	17	NA	32937622	32944545	TCCTGATGCCTGTACACCTCTTGAA	1	CCCAGAATCTCTTATGTTAAAGATTTCTG	0
NM_000059	6962408	18	NA	32944639	32945094	ATGGAGGAAATGTTGGTTGTGTTGATG	1	TATTCAAAGAGCATACCCTATACAGTG	1
NM_000059	6962689	26	NA	32972352	32972408	GGCCAAAAGGAAGTCTGTTTCCACA	1	TCAGCCCAGATGACTTCAAAGTCTTG	2
