# Supplementary material for: Investigation of Experimental Factors That Underlie BRCA1/2 mRNA Isoform Expression Variation: Recommendations for Utilizing Targeted RNA Sequencing to Evaluate Potential Spliceogenic Variants
Source: Front Oncol. 2018 May 3;8:140. doi: 10.3389/fonc.2018.00140 (PMC5943536; doi:10.3389/fonc.2018.00140)
Supplement: Supplementary file 17 [file table_6.xlsx]

## Sheet: Sheet1
Table S6. BRCA1 mRNA isoforms detected previously in control samples by Colombo et al. [1] and in this study using targeted RNA-seq.
Splice	RNA isoform†	Functional Annotation	Targeted RNA-seq detection		Reasons for non-detection by targeted RNA-seq	Detected previously‡
Junction			controls	cases
Cassette biotype
∆2	r.-19_80del	Non-Coding	Yes	Yes		Yes
∆3	r.81_134del	PTC-NMD1	No	No	No probe set	Yes
▼4	r.134_135ins135-4047_135-3932	PTC-NMD	No	No	No probe set	Yes
∆5	r.135_212del	No FS	Yes	Yes		Yes
∆9	r.548_593del	PTC-NMD	Yes	Yes		Yes
∆10	r.594_670del	PTC-NMD	Yes	Yes		Yes
∆11	r.671_4096del	No FS	Yes	Yes		Yes
∆13	r.4186_4357del	PTC-NMD	No	No	Probe overlap	Yes
▼13A	r.4357_4358ins4358-2785_4358-2719	No FS	Yes	No		Yes
∆14	r.4358_c.4484del	PTC-NMD	Yes	No		Yes
∆15	r.4485_4675del	PTC-NMD	Yes⌘	Yes		Yes
∆17	r.4987_5074del	PTC-NMD	Yes	Yes		Yes
∆18	r.5075_5152del	No FS	Yes	No		Yes
∆20	r.5194_5277del	No FS	No	No	Probe overlap	Yes
∆21	r.5278_5332del	PTC-NMD	Yes	Yes		Yes
∆22	r.5333_5406del	FS-alt STOP	Yes	No		Yes
∆23	r.5407_5467del	FS-alt STOP	No	Yes		Yes
Multi-cassette biotype
∆2,3	r.-19_134del	Non-Coding	No	No	No probe set	Yes
∆2_5	r.-19_217del	Non-Coding	No	No	No probe set	Yes
∆2_10	r.-19_670del	Non-Coding	No	No	No or low expression	Yes
∆7_10	r.302_670del	No FS	Yes⌘	No		No
∆8,9	r.442_593del	PTC-NMD	No	No	No or low expression	Yes
∆8_10	r.442_670del	PTC-NMD	Yes⌘	No		Yes
∆9_10	r.548_670del	No FS	Yes	Yes		Yes
∆9_11	r.548_4096del	No FS	No	Yes		Yes
∆9_12	r.548_4185del	PTC-NMD	No	Yes		Yes
∆10,11	r.594_4096del	PTC-NMD	No	Yes		Yes
∆10_12	r.594_4185del	PTC-NMD	No	No	Probe overlap	Yes
∆11,12	r.671_4185del	PTC-NMD	No	No	No or low expression	Yes
∆14_15	r.4358_4675del	No FS	No	Yes		Yes
∆14_17	r.4358_5074del	No FS	No	Yes		Yes
∆14_18	r.4358_5152del	No FS	No	No	Probe overlap	Yes
∆14_19	r.4358_5196del	PTC-NMD	No	No	Probe overlap	Yes
∆15_17	r.4485_5074del	PTC-NMD	No	No	No or low expression	Yes
∆15_19	r.4485_5193del	PTC-NMD	No	No	Probe overlap	Yes
Δ 18_19	r.5075_5193del	PTC-NMD	No	Yes		No€
∆21,22	r.5278_5406del	No FS	No	No	Probe overlap	Yes
∆21_23	r.5278_5467del	FS-alt STOP	No	No	No or low expression	Yes
∆22,23	r.5333_5467del	FS-alt STOP	No	No	Probe overlap	Yes
Splice acceptor shifts
∆2p	r.-19_-7del	UTR	No	No	Cuts into probe	Yes
∆6p	r.213_215del	No FS	No	Yes		No
∆8p	r.442_444del	No FS	Yes	Yes		Yes
▼10p	r.670_671ins670+1-670-21	No FS	Yes	Yes		No
∆13p	r.4186_4188del	No FS	Yes	Yes		Yes
∆14p	r.4358_4360del	No FS	Yes	Yes		Yes
Splice donor shifts
∆1Aq	r.-25_-20del	UTR	Yes	Yes		Yes
▼1aA	r.-20_-19ins-20+1_-20+89	UTR	Yes	Yes		Yes
∆5q	r.191_212del	PTC-NMD	Yes	Yes		Yes
∆6q	r.293_301del	No FS	Yes⌘	No		No€
∆11q	r.788_4096del	No FS	Yes	Yes		Yes
∆11q	r.788_4104del	PTC-NMD	No	Yes		No
Intronization
11∆3110	r.788_3897del	PTC-NMD	No	No	No probe set	Yes
11∆3240	r.788_4027del	No FS	No	No	No probe set	Yes
Terminal modification
(1B)		UTR	Yes	Yes		Yes
(IRIS)		IntronSTOP+polyA	No	No	No probe set	Yes
Splice donor shift + (Multi)-cassette
∆1Aq,2	r.-25_80del	Non-Coding	Yes	No		Yes
∆1Aq_3	r.-25_134del	Non-Coding	No	No	No probe set	Yes
∆1Aq_5	r.-25_217del	Non-Coding	No	No	No or low expression	Yes
∆1Aq_10	r.-25_670del	Non-Coding	Yes⌘	No		Yes
Splice acceptor shift + (Multi)-cassette
Δ2, Δ3p (7nt)	r.-19_87del	Non-Coding	Yes⌘	Yes		No
∆10_13p	r.594_4188del	PTC-NMD	No	No	No or low expression	Yes
∆11_13p	r.671_4188del	PTC-NMD	No	No	No or low expression	Yes
∆13_14p	r.4186_4360del	PTC-NMD	No	No	Probe overlap	Yes
▼13A,∆14p	r.4357_4358ins4358-2785_4358-2719+r.4358_4360del	No FS	No	No	Probe overlap	Yes
Terminal Modification + (Multi)-cassette
(1B),∆2	r.-19_80del	Non-Coding	Yes	Yes		Yes
(1B),∆2,3	r.-19_134del	Non-Coding	No	No	No probe set	Yes
(1B),∆2_5	r.-19_217del	Non-Coding	No	No	No probe set	Yes
Multi-cassette + insertion
∆2,3,▼4	r.-19_134del+r.134_135ins135-4047_135-3932	Non-Coding	No	No	No probe set	Yes
Splice donor shift + Splice acceptor shift
∆1Aq,Δ2p	r.-25_-7del	UTR	No	No	Cuts into probe	Yes
Splice donor shift + Multi-cassette + Cassette
∆1Aq_3,▼4	r.-25_134del+r.134_135ins135-4047_135-3932	Non-Coding	No	No	No probe set	Yes
Splice acceptor shift + (Multi)-cassette + splice donor shift
Δ11q, Δ12-23, Δ24p	r.2403_6872del	FS - alt STOP	Yes⌘	No		No
Δ13q, Δ14-23, Δ24p	r.4355_6858del	No FS	Yes⌘	No		No
Δ13q, Δ14-23, Δ24p	r.4334_6867del	FS - alt STOP	Yes	Yes		No
Exonisation
▼1	r.-20_-19ins-20-620_-20->669	No FS	Yes	Yes		No
▼2	r.80_81ins80+2337_80+2459		Yes	No		No✤
▼19§	r.5193_5194ins5194-1087_5194->1116		Yes	No		No
▼13§	r.4357_4358ins4358-389_4358->431		Yes⌘	No		No
▼8§	r.547_548 ins 548-202	Unknown	Yes⌘	No		No
▼12§	r.4185_4186 ins4186+709	Unknown	Yes	No		No
▼21§	r.5332_5333 ins 5333-866	Unknown	Yes	No		No
▼21§	r.5332_5333 ins 5333-586	Unknown	Yes⌘	No		No
BRCA1 alternative splicing events not validated by Colombo et al. [1].
▼1aA+∆2_17	r.-20_-19ins-20+1_-20+89 + r.-19_5074del	No FS	No	No	No or low expression
∆3_5	r.81_217del	PTC-NMD	No	No	No or low expression
∆5q,6	r.191_301del	PTC-NMD	No	No	No probe set
∆6,7	r.213_441del	PTC-NMD	No	No	Probe overlap
∆13_19	r.4186_5193del	No FS	No	No	No or low expression
∆17_19	r.4987_5193del	No FS	No	No	No probe set
∆18_20	r.5075_5277del	PTC-NMD	No	No	Probe overlap
∆19	r.5153_5193del	PTC-NMD	No	No	No or low expression
† According to the HGVS guidelines (http://www.hgversusorg/mutnomen). Numbers indicate the nucleotide in relation to the A of the AUG initiation codon of Ensemble reference transcript ENST00000380152.
‡ Colombo et al. [1].
§ Detected from q end and actual length of insertion is unconfirmed.
⌘ Detected only in NMD inhibitor treated samples.
✤ Detected in Davy et al. [2].
€ Detected in Hojny et al. [3].
Abbreviations: del, deletion; FS, frame shift; ins, insertion; NMD, nonsense-mediated decay; PTC, premature termination codon; STOP, stop codon; UTR, Untranslated region.
