# Supplementary material for: Investigation of Experimental Factors That Underlie BRCA1/2 mRNA Isoform Expression Variation: Recommendations for Utilizing Targeted RNA Sequencing to Evaluate Potential Spliceogenic Variants
Source: Front Oncol. 2018 May 3;8:140. doi: 10.3389/fonc.2018.00140 (PMC5943536; doi:10.3389/fonc.2018.00140)
Supplement: Supplementary file 18 [file table_7.xlsx]

## Sheet: Sheet1
Table S7. BRCA2 mRNA isoforms detected previously in control samples by Fackenthal et al. [4] and in this study using targeted RNA-seq.
Splice junction	cDNA position†	Functional Annotation	Targeted RNA-seq detection		Reason for non-detection by targeted RNA-seq	Identified previously‡
			Controls	Cases
Cassette biotype
∆2	c.-38_67del	Non-coding	No	No	No probes	Yes
∆3	c.68_316del	no FS	No	No	No probes	Yes
∆4	c.317_425del	PTC-NMD	No	No	Minor isoform	Yes
∆5	c.426_475del	PTC-NMD	No	No	No probes	Yes
∆6	c.476_516del	PTC-NMD	No	No	No probes	Yes
∆11	c.1910_6841del	no FS	Yes	No		No
∆12*	c.6842_6937del	no FS	Yes	Yes		Yes
∆17	c.7806_7976del	no FS	No	No	Minor isoform	Yes
∆18	c.7977_8331del	PTC-NMD	No	No	No probes	Yes
∆19	c.8332_8487del	PTC-NMD	No	No	No probes	Yes
∆20	c.8488_8632del	PTC-NMD	Yes	Yes		Yes
∆22	c.8755_8953del	PTC-NMD	Yes⌘	No		Yes
∆25*	c.9257_9501	PTC-NMD	No	Yes		No
Multi-cassette biotype
∆3-4	c.68_c.425del	PTC-NMD	Yes⌘	No		Yes
∆3-7	c.68_631del	no FS	No	No	No probes	Yes
∆4-7	c.317_631del	no FS	No	No	No probes	Yes
∆5-6	c.426_516del	PTC-NMD	No	No	Minor isoform	Yes
∆5-7	c.426_631del	PTC-NMD	No	No	No probes	Yes
∆9-10	c.682_1909del	PTC-NMD	Yes	No		No✤
∆11-12	c.1910_6937del	no FS	Yes⌘	No		No
∆12-13	c.6842_7007del	PTC-NMD	No	No	Minor isoform	Yes
∆15-16	c.7436_7805del	PTC-NMD	Yes⌘	No		No
∆17-18	c.7806_8331del	PTC-NMD	No	No	No probes	Yes
∆19,20	c.8332_8632del	PTC-NMD	No	Yes		No
Splice acceptor shift
∆12p	c.6842_6844del	No FS	Yes	Yes		No
∆23p	c.8954_9004del	PTC-NMD	No	No	No probes	Yes
∆27p	c.9649_9710	PTC-NMD	No	Yes		No
Splice donor shift
▼8q	c.681_682ins681+1_681+4	PTC-NMD	Yes⌘	No		No
Splice acceptor shift + Cassette
∆22,23p	c.8755_9004del	PTC-NMD	No	No	No probes	Yes
Splice donor shift + Cassette
∆6q,7	c.478_631del	PTC-NMD	No	No	No probes	Yes
Splice donor shift + splice acceptor (+ Cassette)
∆15q, 16p	c.7406_7813del	PTC-NMD	No	Yes		No
∆19q,∆20,21p	c.8476-8645	No FS	Yes⌘	No		No
Exonisation
▼15§	c.7617_7618ins7618-212_7618-xx	Unknown	Yes⌘	No		No
▼20a§	c.8633-1262_c.8633-1294ins	Unknown	Yes	Yes		No
▼20b	r.8632_8633ins8633-1327_8633-1264	PTC-NMD	Yes⌘	No		Yes
▼24a§	c.9256_9257ins9257-11559_9257-xx	Unknown	Yes	Yes		No
▼24b§	c.9256_9257ins9257-10657_9257-xx	Unknown	Yes	Yes		No
▼25§	c.9648_9649ins9649-781_9649-xx	Unknown	Yes	Yes		No
† According to the HGVS guidelines (http://www.hgversusorg/mutnomen). Numbers indicate the nucleotide in relation to the A of the AUG initiation codon of Ensemble reference transcript ENST00000380152.
‡ Fackenthal et al. [1].
§ Detected from q end and actual length of insertion is unconfirmed.
⌘ Detected only in NMD inhibitor treated samples.
✤ Detected in Davy et al. [2].
Abbreviations: del, deletion; FS, frame shift; ins, insertion; NMD, nonsense-mediated decay; PTC, premature termination codon; STOP, stop codon; UTR, Untranslated region.
