# Supplementary material for: Investigation of Experimental Factors That Underlie BRCA1/2 mRNA Isoform Expression Variation: Recommendations for Utilizing Targeted RNA Sequencing to Evaluate Potential Spliceogenic Variants
Source: Front Oncol. 2018 May 3;8:140. doi: 10.3389/fonc.2018.00140 (PMC5943536; doi:10.3389/fonc.2018.00140)
Supplement: Supplementary file 19 [file table_8.xlsx]

## Sheet: Sheet1
Table S8. Number of controls and variant carriers with detectable levels of BRCA1 mRNA isoforms, with and without treatment of a NMD inhibitor, identified using targeted RNA-seq.
Splice Junction	RNA isoform†	Functional Annotation	Targeted RNA-seq detection controls		Targeted RNA-seq detection BRCA1 carriers		Detected previously‡
			Treated	Untreated	Treated	Untreated
Cassette biotype
Δ2	r.-19_80del	Non-Coding	2	1	2	0	Yes
Δ5	r.135_212del	No FS	3	5	2	0	Yes
Δ9	r.548_593del	PTC-NMD	5	3	2	0	Yes
Δ10	r.594_670del	PTC-NMD	5	1	2	2	Yes
Δ11	r.671_4096del	No FS	2	2	2	2	Yes
▼13A	r.4357_4358ins4358-2785_4358-2719	No FS	1	1	0	0	Yes
Δ14	r.4358_c.4484del	PTC-NMD	4	1	0	0	Yes
Δ15	r.4485_4675del	PTC-NMD	4	0	3	0	Yes
Δ17	r.4987_5074del	PTC-NMD	4	1	2	0	Yes
Δ18	r.5075_5152del	No FS	1	1	0	0	Yes
Δ21	r.5278_5332del	PTC-NMD	2	3	1	0	Yes
Δ22	r.5333_5406del	FS-alt STOP	4	4	0	1	Yes
Δ23	r.5407_5467del	FS-alt STOP	0	0	1	1	Yes
Multi-cassette biotype
Δ7_10	r.302_670del	No FS	1	0	0	0	No
Δ8_10	r.442_670del	PTC-NMD	1	0	0	0	Yes
Δ9_10	r.548_670del	No FS	14	14	4	4	Yes
Δ9_11	r.548_4096del	No FS	0	0	1	0	Yes
Δ9_12	r.548_4185del	PTC-NMD	0	0	1	0	Yes
Δ10,11	r.594_4096del	PTC-NMD	0	0	1	0	Yes
Δ14_15	r.4358_4675del	No FS	0	0	1	0	Yes
Δ 18_19	r.5075_5193del	PTC-NMD	0	0	1	0	No
Splice acceptor shifts
Δ6p	r.213_215del	No FS	0	0	1	0	No
Δ8p	r.442_444del	No FS	13	12	3	2	Yes
▼10p	r.670_671ins670+1-670-21	No FS	1	1	1	0	No
Δ13p	r.4186_4188del	No FS	9	6	3	1	Yes
Δ14p	r.4358_4360del	No FS	8	7	2	1	Yes
Splice donor shifts
Δ5q	r.191_212del	PTC-NMD	4	1	2	0	Yes
Δ6q	r.293_301del	No FS	1	0	0	0	No
Δ11q	r.788_4096del	No FS	11	9	1	0	Yes
Δ11q	r.788_4104del	PTC-NMD	0	0	1	0	No
Splice donor shift + (Multi)-cassette
Δ1Aq,2	r.-25_80del	Non-Coding	2	3	0	1	Yes
Δ1Aq_10	r.-25_670del	Non-Coding	1	0	0	0	Yes
Splice acceptor shift + (Multi)-cassette
Δ2, Δ3p (7nt)	r.-19_87del	Non-Coding	1	0	0	0	No
Splice acceptor shift + (Multi)-cassette + splice donor shift
Δ11q, Δ12-23, Δ24p	r.2403_6872del	FS - alt STOP	1	0	0	0	No
Δ13q, Δ14-23, Δ24p	r.4355_6858del	No FS	1	0	0	0	No
Δ13q, Δ14-23, Δ24p	r.4334_6867del	FS - alt STOP	3	3	0	1	No
Exonisation
▼1	r.-20_-19ins-20-620_-20->669	No FS	7	11	1	2	No
▼2§	r.80-81del81-3336_81->3377	Unknown	2	2	0	0	No
▼19§	r.5193_5194ins5194-1087_5194->1116	Unknown	2	1	0	0	No
▼13§	r.4357_4358ins4358-389_4358->431	Unknown	1	0	0	0	No
▼8§	r.547_548 ins 548-202	Unknown	4	0	1	0	No
▼12§	r.4185_4186 ins4186+709	Unknown	3	1	0	0	No
▼21§	r.5332_5333 ins 5333-866	Unknown	3	1	3	0	No
▼21§	r.5332_5333 ins 5333-586	Unknown	2	0	0	0	No
† According to the HGVS guidelines (http://www.hgversusorg/mutnomen). Numbers indicate the nucleotide in relation to the A of the AUG initiation codon of Ensembl reference transcript ENST00000380152.
‡ Colombo et al. (2014).
§ Detected from q end and actual length of insertion is unconfirmed.
Abbreviations: del, deletion; FS, frame shift; ins, insertion; NMD, nonsense-mediated decay; PTC, premature termination codon; STOP, stop codon; UTR, Untranslated region.
