# Supplementary material for: Investigation of Experimental Factors That Underlie BRCA1/2 mRNA Isoform Expression Variation: Recommendations for Utilizing Targeted RNA Sequencing to Evaluate Potential Spliceogenic Variants
Source: Front Oncol. 2018 May 3;8:140. doi: 10.3389/fonc.2018.00140 (PMC5943536; doi:10.3389/fonc.2018.00140)
Supplement: Supplementary file 20 [file table_9.xlsx]

## Sheet: Sheet1
Table S9. Number of controls and variant carriers with detectable levels of BRCA2 mRNA isoforms, with and without treatment of a NMD inhibitor, identified using targeted RNA-seq.
Splice junction	cDNA position†	Functional Annotation	Targeted RNA-seq detection controls		Targeted RNA-seq detection BRCA2 variant carriers		Identified previously‡
			Treated	Untreated	Treated	Untreated
Cassette biotype
Δ11	c.1910_6841del	no FS	2	1	0	0	No
Δ12*	c.6842_6937del	no FS	10	3	2	1	Yes
Δ20	c.8488_8632del	PTC-NMD	2	1	1	2	Yes
Δ22	c.8755_8953del	PTC-NMD	1	0	0	0	Yes
Δ25*	c.9257_9501	PTC-NMD	0	0	1	0	No
Multi-cassette biotype
Δ3-4	c.68_c.425del	PTC-NMD	2	0	0	0	Yes
Δ9-10	c.682_1909del	PTC-NMD	2	2	0	0	No
Δ11-12	c.1910_6937del	no FS	1	0	0	0	No
Δ15-16	c.7436_7805del	PTC-NMD	1	0	0	0	No
Δ19,20	c.8332_8632del	PTC-NMD	0	0	1	0	No
Splice acceptor shift
Δ12p	c.6842_6844del	No FS	6	2	0	1	No
Δ27p	c.9649_9710	PTC-NMD	0	0	1	0	No
Splice donor shift
▼8q	c.681_682ins681+1_681+4	PTC-NMD	1	0	0	0	No
Splice donor shift + splice acceptor (+ Cassette)
Δ15q, 16p	c.7406_7813del	PTC-NMD	0	0	1	0	No
Δ19q, Δ20, 21p	c.8476-8645	No FS	1	0	0	0	No
Exonisation
▼15§		Unknown	2	0	0	0	No
▼20a§	c.8633-1262_c.8633-1294ins	Unknown	13	8	4	3	No
▼20b	c.8633-1327_c.8633-1264ins64	PTC-NMD	1	0	0	0	Yes
▼24a§		Unknown	4	2	1	1	No
▼24b§		Unknown	11	5	2	1	No
▼25§		Unknown	9	4	2	0	No
† According to the HGVS guidelines (http://www.hgversusorg/mutnomen). Numbers indicate the nucleotide in relation to the A of the AUG initiation codon of Ensembl reference transcript ENST00000380152.
‡Fackenthal et al. (2016).
§ Detected from q end and actual length of insertion is unconfirmed.
Abbreviations: del, deletion; FS, frame shift; ins, insertion; NMD, nonsense-mediated decay; PTC, premature termination codon; STOP, stop codon; UTR, Untranslated region.
