# Supplementary material for: Investigation of Experimental Factors That Underlie BRCA1/2 mRNA Isoform Expression Variation: Recommendations for Utilizing Targeted RNA Sequencing to Evaluate Potential Spliceogenic Variants
Source: Front Oncol. 2018 May 3;8:140. doi: 10.3389/fonc.2018.00140 (PMC5943536; doi:10.3389/fonc.2018.00140)
Supplement: Supplementary file 21 [file table_10.xlsx]

## Sheet: Sheet1
Table S10. Splicing events detected in LCLs carrying a rare BRCA1 or BRCA2 variant compared to those detected in the same LCLs from the ENIGMA multicentre study Whiley, de la Hoya [5]. The isoforms detected here and by Whiley, de la Hoya [5] are listed in the overlapping boxes.
Variant and LCL number†	Alternative splicing events detected using Targeted RNA-seq			Alternative splicing events detected previously by Whiley, de la Hoya [5]
BRCA1
BRCA1 c.671-2 A>G	1B Δ2	Δ mid exon 10‡				Δ9-10,11q
(IVS 10-2 A>G)	▼1aA Δ2	Δ11q (3317nt)‡	Δ9			Δ9,11
LCL4	Δ5	Δ13p (3nt)⌘	Δ9-10			Δ9-12
	Δ5q	Δ14p (3nt)	Δ10			Δ9,11q
	Δ6p‡	Δ15	Δ11			Δ10,11q
	Δ8p (3nt)	Δ17	Δ9-11‡			Δ11q¶ (3309nt)
	ins10p (21nt)		Δ10-11‡			Δ3.2kb exon 11¶
			▼21			Δ11q+ins i13
						Δ11-12
BRCA1 c.5467+5 G>C	1B Δ2	Δ9-12‡				Δ21,23
(IVS 23+5 G>C)	Δ5	Δ11				Δ22-23¶
LCL2	Δ5q	Δ11q (3309nt)				Δ22
	▼8	Δ14-15‡	Δ23‡
	Δ9	Δ15	Δ21
	Δ9-10	Δ17
	Δ8p (3nt)	Δ18-19‡
	Δ13p (3nt)	▼21
	Δ14p (3nt)
BRCA1 c.135-1 G>T§	Δ10					Δ5q¶	Δins i3¶
(IVS 4-1 G>T)	Δ9-10		No overlap			Δ3¶	Δins i3 +Δ5¶
LCL8	Δ8p (3nt)⌘					Δ3,5¶
						Δ5-6
BRCA1 c.594-2 A>C§	Δ11⌘					Δ9	Δ10,11q
(IVS 9-2 A>C)	Δ22		Δ10			Δ9-11	Δ11q¶
LCL5	Δ13p (3nt)⌘		Δ9-10			Δ9,10,11q	Δ11q+ins i13
	Δ8p (3nt)					Δ9,11q	ins i21¶
BRCA2
BRCA2 c.426-12_8delGTTT	Δ12					Δ3,5	Δ5-7¶
(IVS 4-12 -8 del5)	▼20 (21nt)		No overlap			Δ3-5¶	Δ6-7¶
LCL1	▼24					Δ4-7¶	Δ6q,7¶
	▼25					Δ5¶	ins 18bp¶
BRCA2 c.9501+3 A>T	Δ15q-16p‡					▼i23¶
(IVS 23+5 A>T)	▼20 (21nt)		Δ25‡
LCL3
BRCA2 c.7988 A>T	▼20 (21nt)					Δ17-18¶
LCL7	▼24		No overlap			Δ18¶
	Δ27p‡
BRCA2 c.8632+1 G>A	Δ12					Δ19¶
(IVS 20+1 G>A)	▼25‡		Δ20
LCL6			Δ19-20‡
			▼20 (21nt)
† Sample numbers are listed in S1 Table.
‡ Isoform was detected solely in the variant carrier sample specified.
§ Low read count returned resulting in few alternative mRNA isoforms detected.
¶ Events not detected with Targeted RNA-seq due to probe placement limitations;
⌘ Events that are located within the primers used for detection with PCR-based methods but were not identified.
Abbreviations: bp, base pairs; del, deletion; IVS, Intervening sequence; ins, insertion; nt, nucleotides.
